# Supplementary material
Source: Springer Nature journal article supplement (https://www.springermedizin.de/resource/supplementary/13223_2014_516_MOESM1_ESM.pdf/9596704)

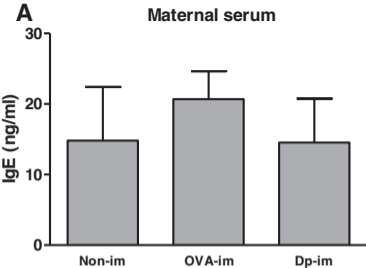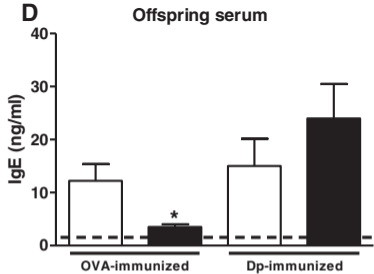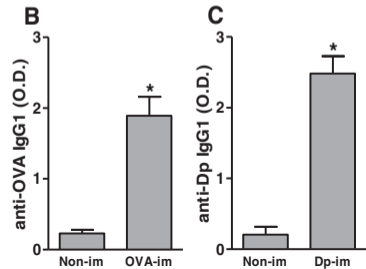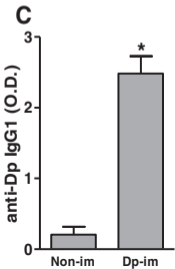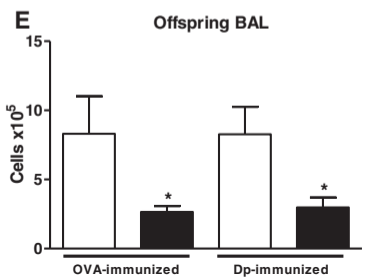

Supplement: MOESM1 [file 9596704]
